# Supplementary material for: Interprofessional Therapeutic Drug Monitoring of Carbapenems Improves ICU Care and Guideline Adherence in Acute-on-Chronic Liver Failure
Source: MDPI journal article supplement (doi:10.3390/antibiotics12121730), 2023-12-14
Supplement: s1 [file s1]

**Supplementary Table S1.** Presentation of patient characteristics, including sex and age, and initial, 2nd, and 3rd results of therapeutic drug monitoring (TDM) for meropenem (meropenem serum concentration in mg/l), as well as initial, 2nd, and 3rd recommendation of the interprofessional team.

| Patient | Sex | Age | Initial TDM | Initial Recommendation                                         | 2nd TDM | 2nd Recommendation                                          | 3rd TDM | 3rd Recommendation            |
|---------|-----|-----|-------------|----------------------------------------------------------------|---------|-------------------------------------------------------------|---------|-------------------------------|
| 1       | M   | 36  | 10.0        | No change in meropenem dosage                                  | 24.4    | Decrease in meropenem dosage                                | 13.5    | No change in meropenem dosage |
| 2       | M   | 52  | 8.4         | No change in meropenem dosage                                  | -/-     | -/-                                                         | -/-     | -/-                           |
| 3       | M   | 40  | 11.4        | No change in meropenem dosage                                  | 24.6    | Change to another antibiotic therapy                        | -/-     | -/-                           |
| 4       | F   | 34  | 32.8        | Decrease in meropenem dosage                                   | -/-     | -/-                                                         | -/-     |                               |
| 5       | M   | 58  | 20.5        | Change to another antibiotic therapy                           | -/-     | -/-                                                         | -/-     | -/-                           |
| 6       | M   | 74  | 33.2        | Decrease in meropenem dosage                                   | -/-     | -/-                                                         | -/-     | -/-                           |
| 7       | F   | 68  | 18.1        | No change in meropenem dosage due to improving kidney function | 14.2    | Stopping of antibiotic therapy                              | -/-     | -/-                           |
| 8       | M   | 62  | 21.0        | Change to another antibiotic therapy                           | -/-     | -/-                                                         | -/-     | -/-                           |
| 9       | F   | 66  | 13.7        | No change in meropenem dosage                                  | 14.9    | No change in meropenem dosage                               | -/-     | -/-                           |
| 10      | M   | 41  | 16.7        | Decrease in meropenem dosage                                   | 9.5     | No change in meropenem dosage                               | -/-     | -/-                           |
| 11      | F   | 69  | 35.2        | Decrease in meropenem dosage                                   | -/-     | -/-                                                         | -/-     | -/-                           |
| 12      | M   | 54  | 13.3        | No change in meropenem dosage                                  | 9.9     | No change in meropenem dosage                               | -/-     | -/-                           |
| 13      | M   | 59  | 14.7        | No change in meropenem dosage                                  | -/-     | -/-                                                         | -/-     | -/-                           |
| 14      | F   | 70  | 8.8         | No change in meropenem dosage                                  | 19.3    | Change to another antibiotic therapy                        | -/-     | -/-                           |
| 15      | M   | 65  | 39.0        | Decrease in meropenem dosage                                   | 11.8    | No change in meropenem dosage                               | -/-     | -/-                           |
| 16      | M   | 58  | 10.0        | No change in meropenem dosage                                  | -/-     | -/-                                                         | -/-     | -/-                           |
| 17      | F   | 67  | 35.5        | Change to another antibiotic therapy                           | -/-     | -/-                                                         | -/-     | -/-                           |
| 18      | M   | 40  | 14.0        | No change in meropenem dosage                                  | -/-     | -/-                                                         | -/-     | -/-                           |
| 19      | M   | 55  | 19.7        | Decrease in meropenem dosage                                   | 10.5    | No change in meropenem dosage                               | -/-     | -/-                           |
| 20      | F   | 36  | 29.5        | Decrease in meropenem dosage                                   | 20.5    | No change in meropenem dosage due to initiation of dialysis | -/-     | -/-                           |
| 21      | M   | 69  | 31.1        | Decrease in meropenem dosage                                   | 13.8    | Change to another antibiotic therapy                        | -/-     | -/-                           |
| 22      | M   | 52  | 26.9        | Decrease in meropenem dosage                                   | -/-     | -/-                                                         | -/-     | -/-                           |
| 23      | F   | 66  | 13.1        | Change to another antibiotic therapy                           | -/-     | -/-                                                         | -/-     | -/-                           |
| 24      | M   | 53  | 18.8        | Change to another antibiotic therapy                           | -/-     | -/-                                                         | -/-     | -/-                           |
| 25      | M   | 62  | 27.5        | Decrease in meropenem dosage                                   | 9.0     | No change in meropenem dosage                               | 10.2    | No change in meropenem dosage |
